# Supplementary material for: The clinical evaluation of a widefield lens to expand the field of view in optical coherence tomography (OCT-A)
Source: PubMed Central journal article supplement (PMC10960788; doi:10.1038/s41598-024-57405-3), 2024-03-23

Comparison of the quality differences in the characteristics considered of the same eye

**FAZ**

with WFL, good quality (4/5)

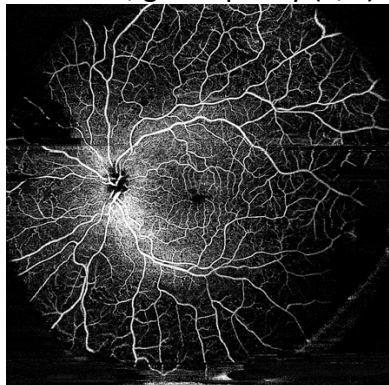

without WFL, good quality (5/5)

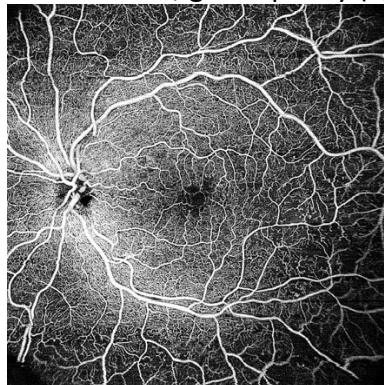

with WFL, bad quality (1/5)

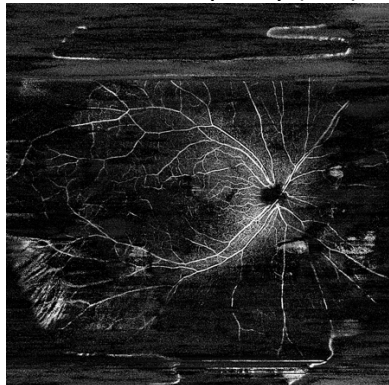

without WFL, good quality (5/5)

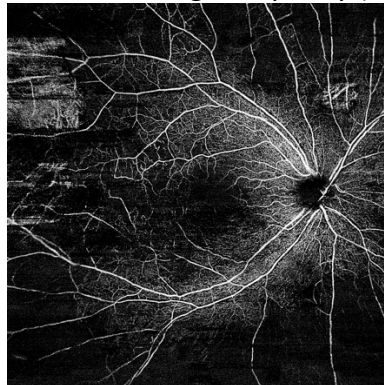

**Motion artefacts**

with WFL, good quality (4/5)

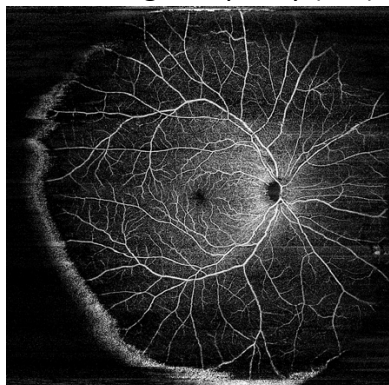

without WFL, good quality (5/5)

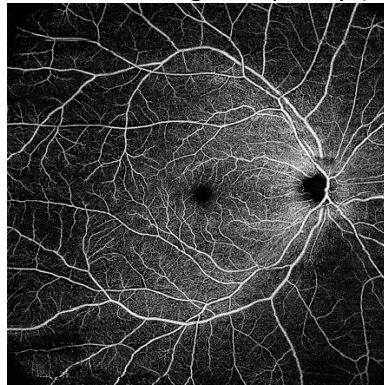

with WFL, bad quality (1/5)

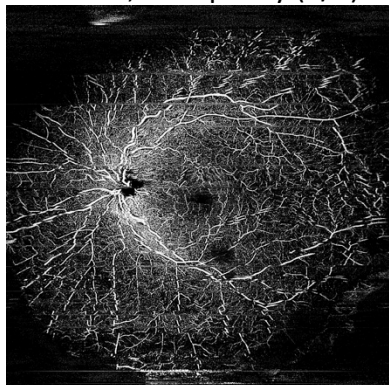

without WFL, good quality (5/5)

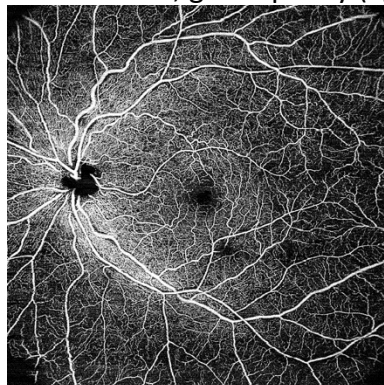

**Shadowing**

with WFL, good quality (5/5)

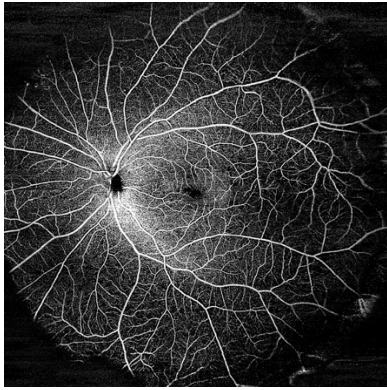

without WFL, good quality (5/5)

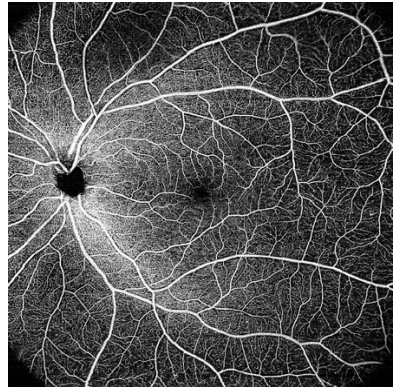

with WFL, bad quality (2/5)

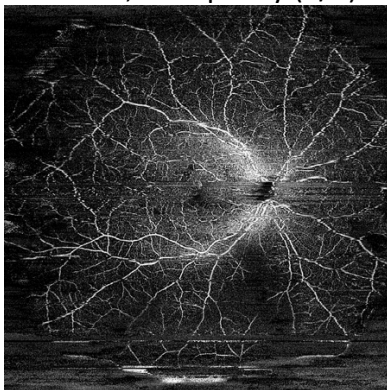

without WFL, good quality (4/5)

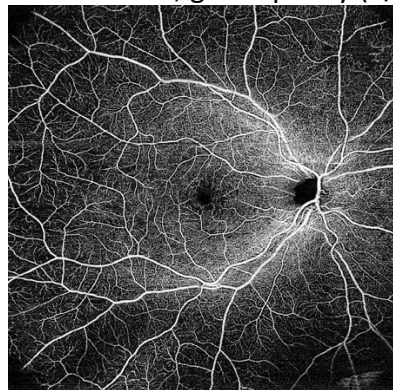

**Vascular quality**

with WFL, good quality (5/5)

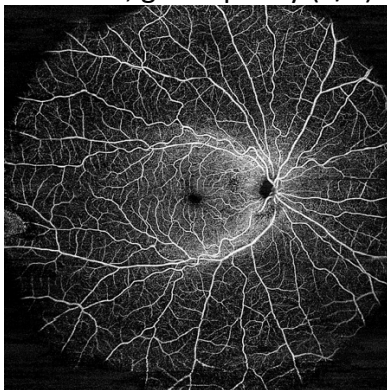

without WFL, good quality (5/5)

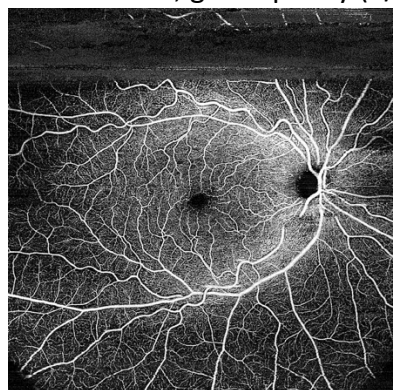

with WFL, bad quality (2/5)

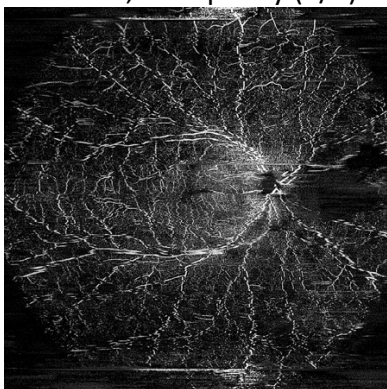

without WFL, good quality (5/5)

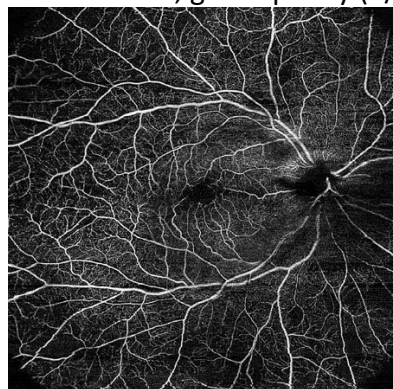

Supplement: 41598_2024_57405_MOESM1_ESM.pdf [file 41598_2024_57405_MOESM1_ESM.pdf]
